# Supplementary material for: Galectin-9-based immune risk score model helps to predict relapse in stage I–III small cell lung cancer
Source: HighWire-hosted journal article supplement (doi:10.1136/jitc-2020-001391), 2020-10-01
Supplement: jitc-2020-001391supp008_data_supplement.pdf [file jitc-2020-001391supp008_data_supplement.pdf]

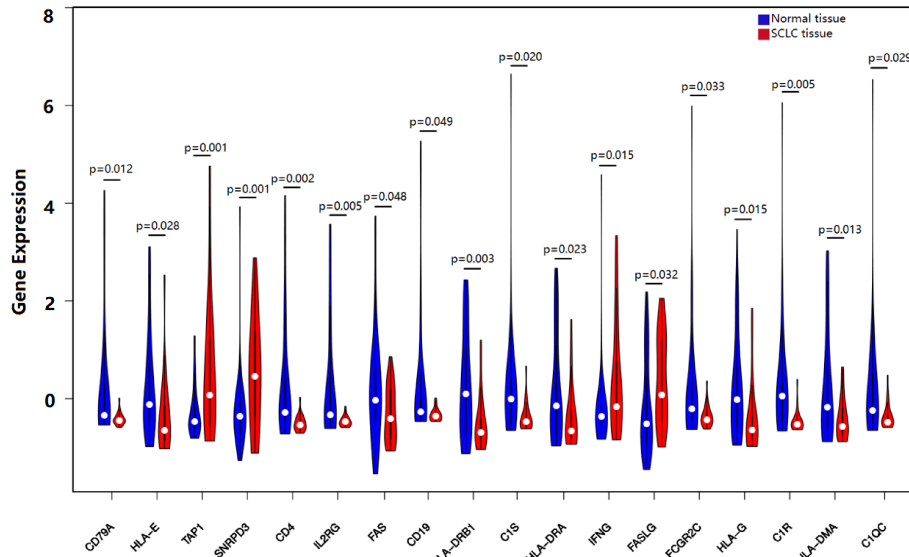

A) Validation of Gal-9-associated genes expression in SCLC

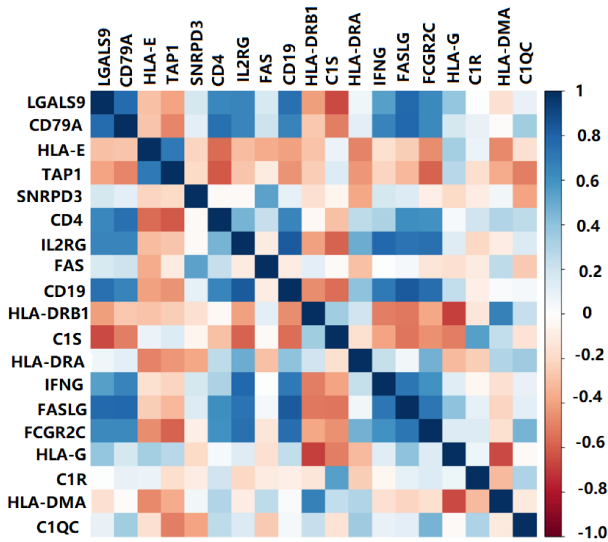

B) Relation between Lgals9 and 18 differentially expressed genes

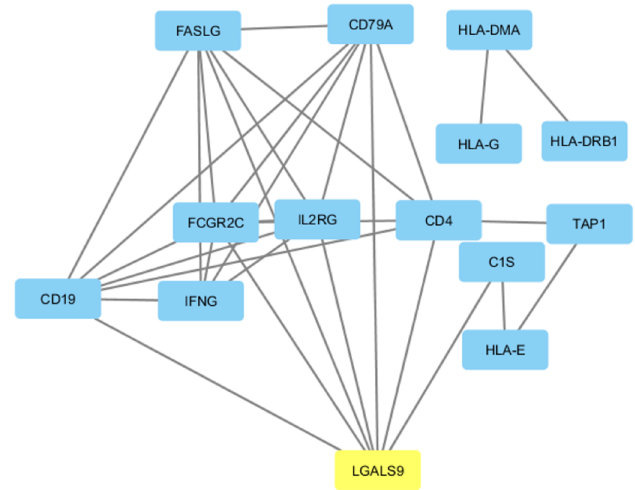

C) The Lgals9-associated network by Cytoscape
