# Supplementary material for: Galectin-9-based immune risk score model helps to predict relapse in stage I–III small cell lung cancer
Source: HighWire-hosted journal article supplement (doi:10.1136/jitc-2020-001391), 2020-10-01
Supplement: jitc-2020-001391supp009_data_supplement.pdf [file jitc-2020-001391supp009_data_supplement.pdf]

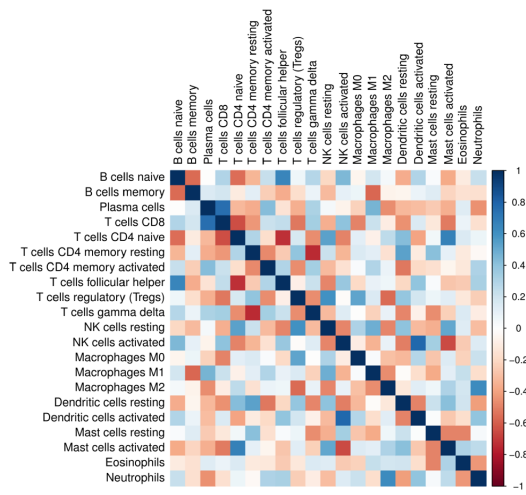

A) Relationship between immune cell proportions in high risk

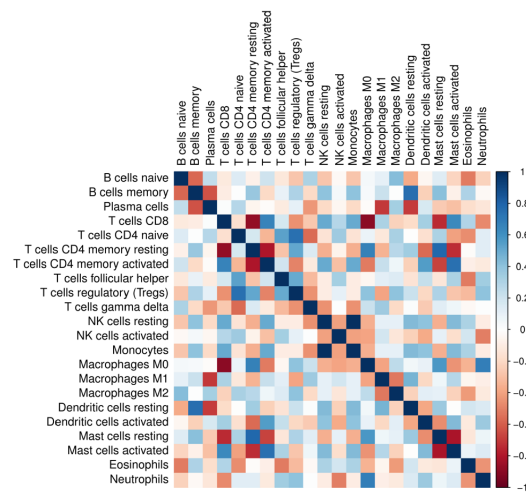

B) Relationship between immune cell proportions in low risk

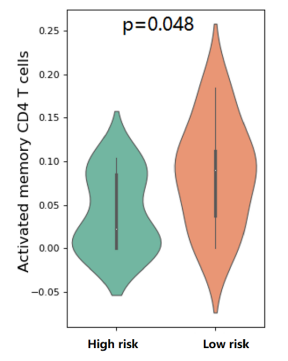

C) Activated memory CD4 T cells
