# Supplementary figures and images for: Galectin-9-based immune risk score model helps to predict relapse in stage I–III small cell lung cancer
Source: HighWire-hosted journal article supplement (doi:10.1136/jitc-2020-001391), 2020-10-01

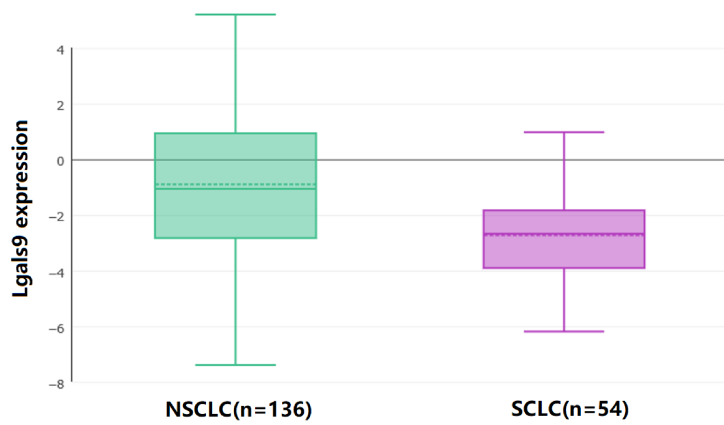

A) CCLE database

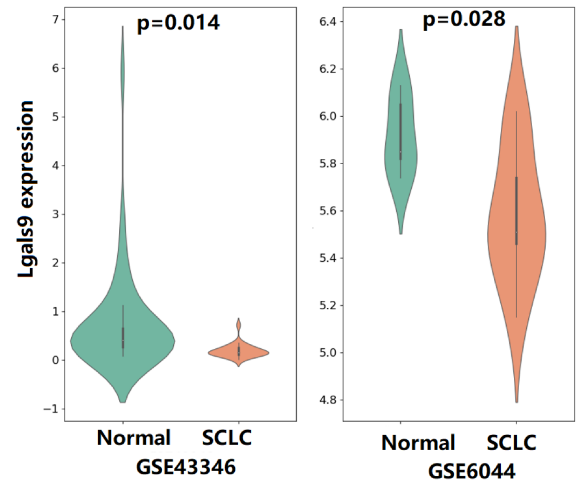

B) GEO database

Supplement: jitc-2020-001391supp006_data_supplement.pdf [file jitc-2020-001391supp006_data_supplement.pdf]

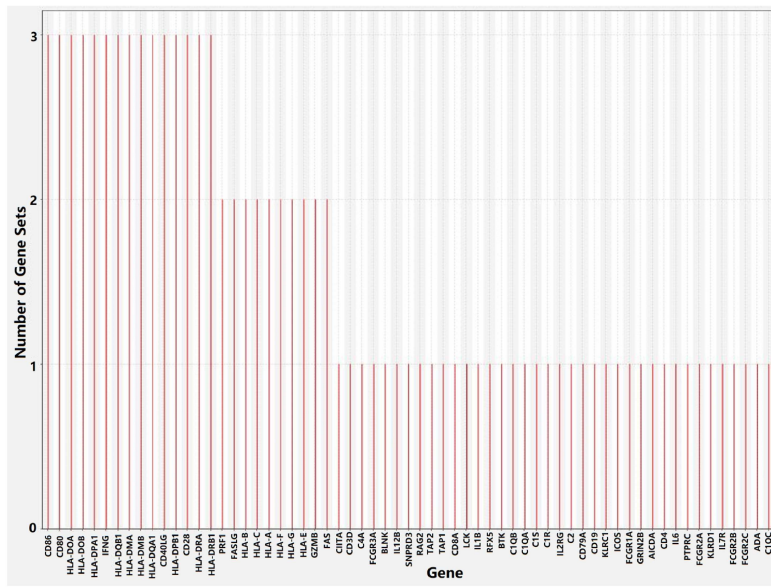

A) Overlapping genes in Gal-9-related pathways.

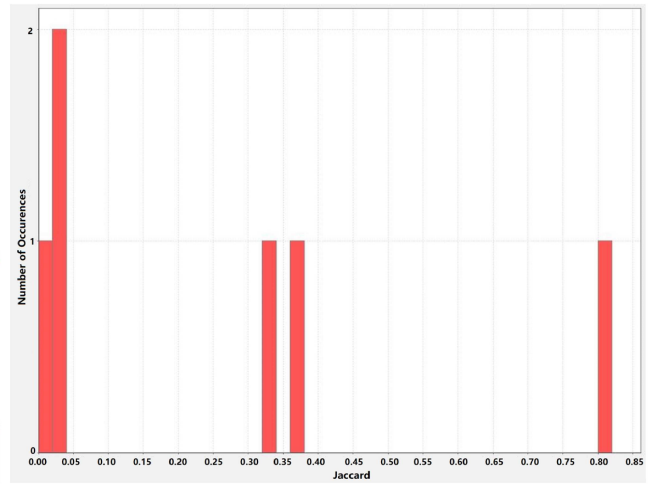

B) The leading edge analysis.

Supplement: jitc-2020-001391supp007_data_supplement.pdf [file jitc-2020-001391supp007_data_supplement.pdf]
